# Supplementary material for: Precise analysis of calcium stable isotope variations in biological apatites using laser ablation MC-ICPMS
Source: Royal Society of Chemistry journal article supplement (doi:10.1039/c5ja00239g), 2015-08-07
Supplement: c5ja00239g1.pdf [file c5ja00239g1.pdf]

## Electronic Supplementary Information

### Precise Analysis of Calcium Stable Isotope Variations in Biological Apatites using Laser Ablation MC-ICPMS

Théo Tacail<sup>1\*</sup>, Philippe Télouk<sup>1</sup>, Vincent Balter<sup>1</sup>

<sup>1</sup> Laboratoire de Géologie de Lyon: Terre Planète Environnement, UMR CNRS 5276 (CNRS, ENSL, Université Lyon 1), Ecole Normale Supérieure de Lyon, 46 Allée d'Italie, 69634 Lyon cedex 07, France.

\* Corresponding author email: [theo.tacail@ens-lyon.fr](mailto:theo.tacail@ens-lyon.fr)

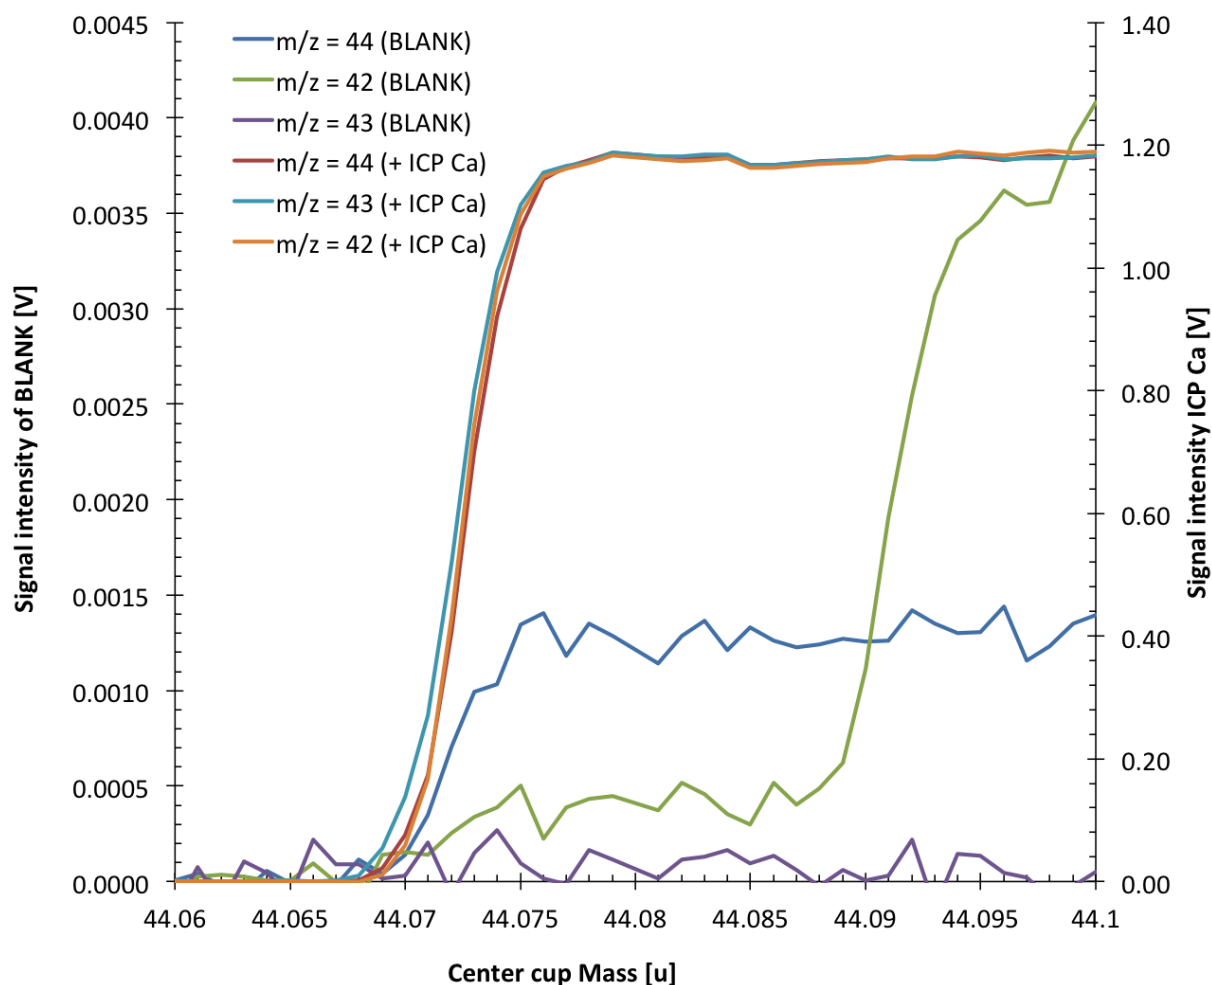

Figure S1: **Mass scans in blank (Ar + He gases only) and with added Ca (ICP Ca *via* Aridus II) in LA mode** measured with settings described in Table 2B. Calcium isotope analyses were carried out between the left side of Ca peak and  $^{40}\text{Ar}^1\text{H}^{2+}$  growing interference on the right side of m/z = 42 BLANK signal. No difference is observed when compared to scans performed in SOL mode only, as published elsewhere (Wieser et al., 2004, Tacail et al., 2014)

**Figure S2: Modelling of doubly charged Sr interferences mis-corrections**

The influences of both parameters  $f_{Sr^{2+}}$  instrumental mass fractionation factor and  $^{87}Sr/^{86}Sr$  radiogenic ratio used for doubly charged Sr interferences corrections were assessed by performing theoretical calculations. We considered that both Ca and Sr were affected by an instrumental mass fractionation following an exponential law with mass fractionation factors  $f_{Ca^{+}}$  and  $f_{Sr^{2+}}$  of 1.7 both.  $^{87}Sr/^{86}Sr$  true ratio was set at 0.7103 and  $^{42}Ca$ ,  $^{43}Ca$  and  $^{44}Ca$  signals were calculated with increasing Sr interferences ( $^{87}Sr^{2+}/^{44}Ca^{+}$  between  $10^{-7}$  to  $10^{-2}$ ).

Corrected  $\delta^{44/42}Ca$  and  $\delta^{43/42}Ca$  (in ‰ per amu) were finally calculated for various  $f_{Sr^{2+}}$  and  $^{87}Sr/^{86}Sr$  correcting parameters (Figure S3A to S3D). The  $\delta^{44/42}Ca$  and  $\delta^{43/42}Ca$  true values (0‰) are found when correction is performed with true  $f_{Sr^{2+}}$  and  $^{87}Sr/^{86}Sr$  (1.7 and 0.7103 respectively)

Slopes and offsets at origins of  $\delta^{43/42}Ca$  -  $\delta^{44/42}Ca$  mass fractionation lines were also calculated using varying  $f_{Sr^{2+}}$  and  $^{87}Sr/^{86}Sr$  correcting parameters.

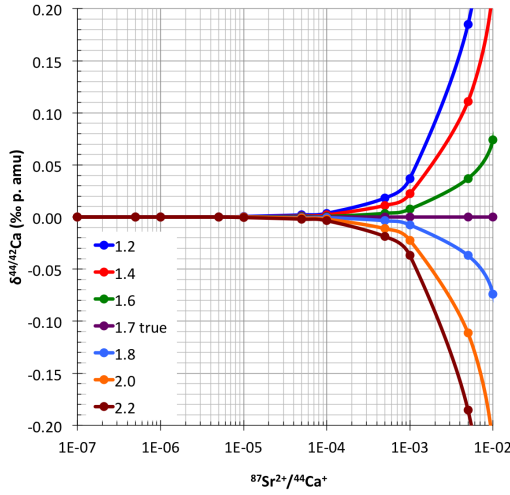

**S2A.  $\delta^{44/42}Ca$  (per amu) for varying corr.  $f_{Sr^{2+}}$**

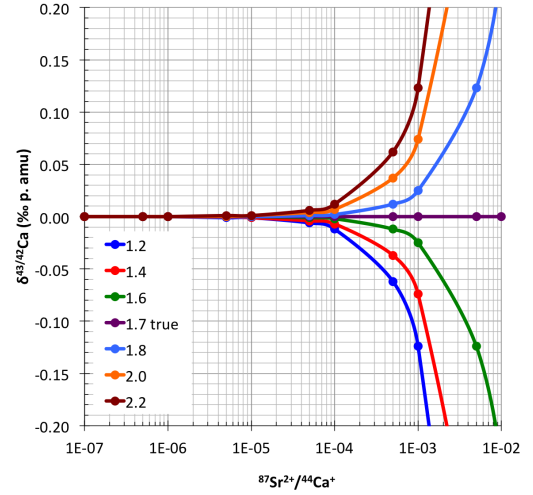

**S2B.  $\delta^{43/42}Ca$  (per amu) for varying corr.  $f_{Sr^{2+}}$**

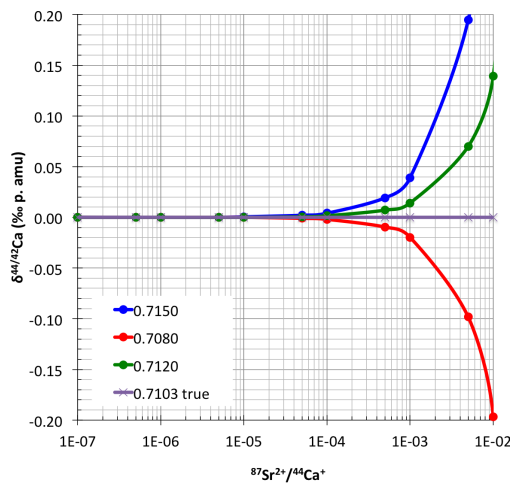

**S2C.  $\delta^{44/42}Ca$  (per amu) for varying corr.  $^{87}Sr/^{86}Sr$**

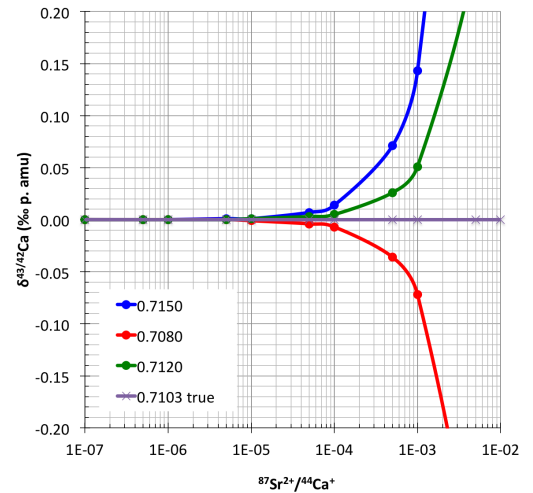

**S2D.  $\delta^{43/42}Ca$  (per amu) for varying corr.  $^{87}Sr/^{86}Sr$**

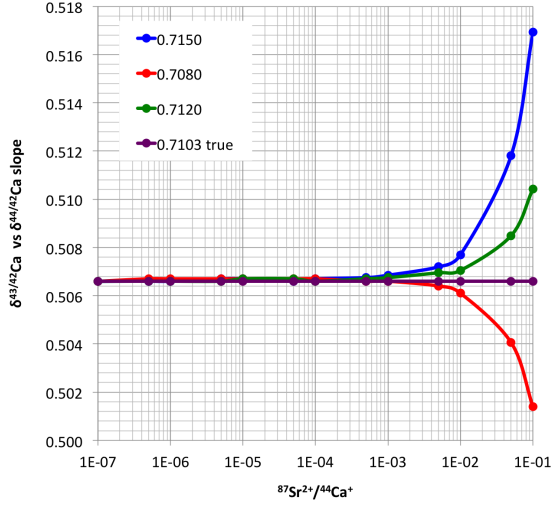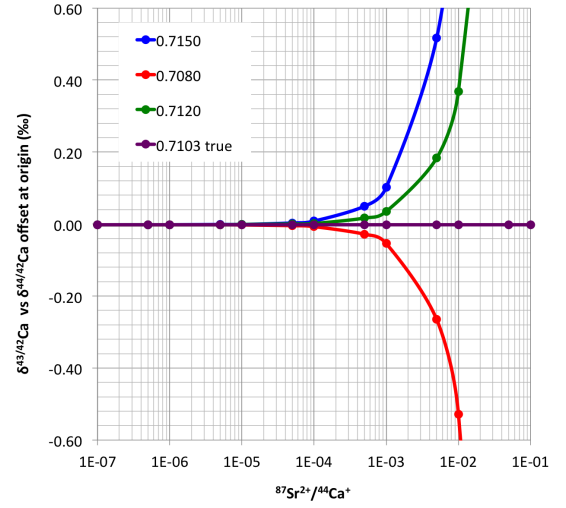

**S2E.**  $\delta^{43/42}Ca$ - $\delta^{44/42}Ca$  slopes for varying corr.  $^{87}Sr/^{86}Sr$

**S2F.**  $\delta^{43/42}Ca$ - $\delta^{44/42}Ca$  offsets at origin for varying corr.  $^{87}Sr/^{86}Sr$

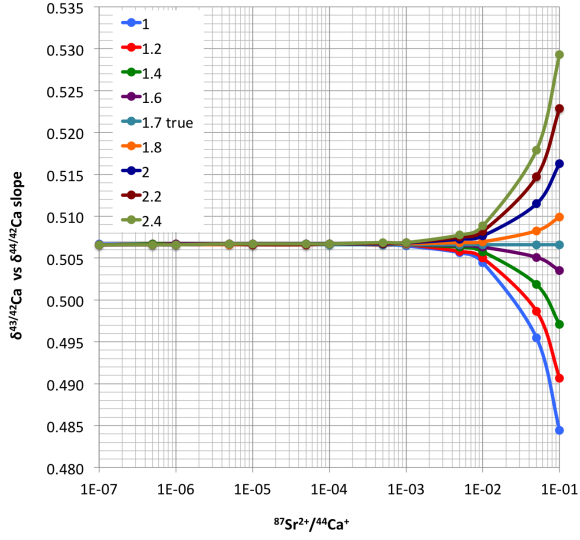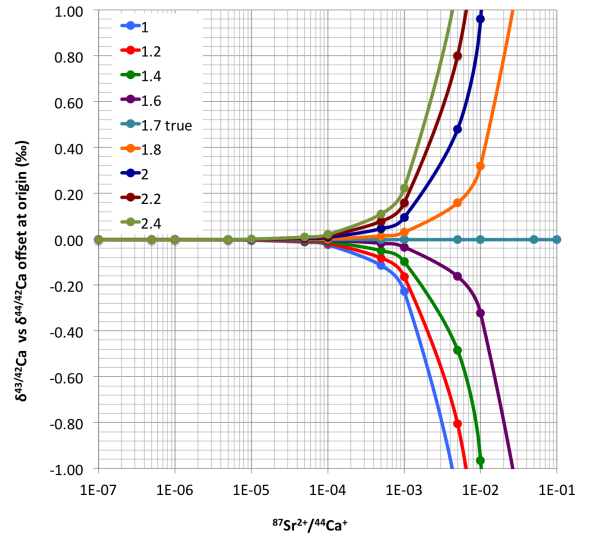

**S2G.**  $\delta^{43/42}Ca$ - $\delta^{44/42}Ca$  slopes for varying corr.  $f_{Sr^{2+}}$

**S2H.**  $\delta^{43/42}Ca$ - $\delta^{44/42}Ca$  offsets at origin for varying corr.  $f_{Sr^{2+}}$
